# Supplementary material for: Soluble CD40 Levels in Plasma Are Associated with Cardiovascular Disease and in Carotid Plaques with a Vulnerable Phenotype
Source: PubMed Central journal article supplement — J Stroke. 2021 Sep 30;23(3):367–76. doi: 10.5853/jos.2021.00178 (PMC8521258; doi:10.5853/jos.2021.00178), 2021-09-30
Supplement: jos-2021-00178-suppl6.pdf [file jos-2021-00178-suppl6.pdf]

**Supplementary Table 5.** Sensitivities, specificities and their 95% CI at various cut-offs of predicted values from LR in predicting atherosclerotic vascular events

| Quantile | Cut-off of predicted value | Sensitivity |              |              | Specificity |              |              |
|----------|----------------------------|-------------|--------------|--------------|-------------|--------------|--------------|
|          |                            | Median      | 95% CI lower | 95% CI upper | Median      | 95% CI lower | 95% CI upper |
| 10%      | 0.060                      | 0.980       | 0.953        | 1.000        | 0.110       | 0.093        | 0.128        |
| 20%      | 0.070                      | 0.899       | 0.852        | 0.946        | 0.212       | 0.191        | 0.235        |
| 30%      | 0.077                      | 0.826       | 0.765        | 0.886        | 0.315       | 0.289        | 0.342        |
| 40%      | 0.086                      | 0.732       | 0.658        | 0.799        | 0.416       | 0.389        | 0.443        |
| 50%      | 0.097                      | 0.664       | 0.584        | 0.738        | 0.520       | 0.493        | 0.546        |
| 60%      | 0.111                      | 0.537       | 0.456        | 0.617        | 0.616       | 0.589        | 0.644        |
| 70%      | 0.123                      | 0.450       | 0.369        | 0.530        | 0.717       | 0.692        | 0.743        |
| 80%      | 0.141                      | 0.342       | 0.269        | 0.423        | 0.817       | 0.796        | 0.840        |
| 90%      | 0.176                      | 0.208       | 0.148        | 0.282        | 0.913       | 0.898        | 0.929        |

Age and disease history (diabetes, hypertension, acute myocardial infarction, and stroke) at baseline were included in the LR model. Confidence intervals were calculated using a R package pROC with 2000 stratified bootstrap replicates. CI, confidence interval; LR, logistic regression.

**Supplementary Table 6.** Spearman correlations of CD40 and CD40L (A.U., CPIP cohort) measured in plaque homogenate versus plaque elements

| Variable                 | CD40 (n=198) |                      |                      | CD40L (n=198) |                      |                      |
|--------------------------|--------------|----------------------|----------------------|---------------|----------------------|----------------------|
|                          | r            | P                    | P, adjusted          | r             | P                    | P, adjusted          |
| Plaque components (mg/g) |              |                      |                      |               |                      |                      |
| Collagen                 | 0.248        | 0.00041              | 0.002                | 0.286         | 4.7×10 <sup>-5</sup> | 0.00052              |
| Elastin                  | 0.351        | 3.8×10 <sup>-7</sup> | 4.2×10 <sup>-6</sup> | 0.339         | 1.3×10 <sup>-6</sup> | 1.7×10 <sup>-5</sup> |
| MMP1                     | 0.262        | 0.00028              | 0.002                | 0.054         | 0.465                | 0.465                |
| MMP2                     | 0.254        | 0.00041              | 0.002                | 0.076         | 0.1                  | 0.41                 |
| MMP9                     | 0.249        | 0.0040               | 0.01                 | 0.121         | 0.1                  | 0.41                 |
| MMP10                    | 0.373        | 1.3×10 <sup>-7</sup> | 1.7×10 <sup>-6</sup> | 0.373         | 0.003                | 0.021                |
| TIMP1                    | 0.363        | 4.2×10 <sup>-7</sup> | 4.2×10 <sup>-6</sup> | 0.204         | 0.006                | 0.035                |
| TIMP2                    | 0.326        | 6.1×10 <sup>-6</sup> | 5.5×10 <sup>-5</sup> | 0.307         | 2.5×10 <sup>-5</sup> | 0.0003               |
| TIMP3                    | 0.219        | 0.048                | 0.063                | 0.153         | 0.171                | 0.409                |

CD40L, CD40 ligand; A.U., arbitrary unit; CPIP, Carotid Plaque Imaging Project; MMP, matrix metalloproteinase; TIMP, tissue inhibitor of metalloproteinase.
